# Supplementary material
Source: Royal Society of Chemistry journal article supplement (https://www.rsc.org/suppdata/dt/1998/2625/d802849.doc)
Supplement: Supplementary file 1 [file d802849.doc]

**1H NMR decoupling experiments for Ru4(-H)4(CO)10(dpp) 2.**

Four separate 1H NMR decoupling experiments were run on **2** to assign the proton resonances of the dpp ligand : off resonance irradiation at 11.00 ppm, and irradiations at 8.89, 8.67 and 7.34 ppm in CDCl3. The results have been summarized in Figure C1. The resonances observed in these experiments have been labelled **A-H** for ease of reference. They are rather broad and do not exhibit the fine structure reported for **2** in the experimental section. However, this is a consequence of how the decoupling experiments were set up and not the result of a fluxional process.

**Interpretation of the decoupling experiments.** The doublet resonances at 8.93 and 8.67 must be due to H7 and H6 respectively (see Figure 1 for adopted numbering scheme), which become inequivalent upon coordination and are shifted to higher frequency relative to the free ligand's singlet resonance at 8.50 ppm. H7 is predicted to be shifted furthest because it is adjacent to the ruthenium-bound nitrogen. The resonance at 8.89 ppm (ddd) is assigned to H2 on the basis of its chemical shift and the observed couplings, and similarly H11 to the resonance at 8.69 ppm, which is partially obscured by the signal arising from H6.

**Irradiation at 8.89 ppm, B (H2).** The irradiation of H2 was not completely clean. Because its resonance lies so close to H7 this has also been partially irradiated and hence appears as a singlet of greatly reduced intensity and, in addition, resonance **C** (assigned to H6) is transformed from a doublet to a singlet. However, since H7 and H6 only couple to each other this unintended irradiation will not affect the other resonances. Clearly, resonance **G** must be due to H3 and this explains the collapse of the triplet (actually a ddd) to a doublet upon the loss of coupling from H2.

**Irradiation at 7.34 ppm, G (H3).** The coupling to resonance **B** was lost upon irradiation of H3 (ds) confirming it to be H2. Furthermore, the loss of a large *3J* coupling to resonance **F** was observed, narrowing it considerably and inferring that it must be due to H4. Finally, integration shows that there are in fact two protons responsible for the complex multiplet **F**.

**Irradiation at 8.66 ppm, C (H6 and H11).** Resonance **C** is a combination of both the signals for protons H6 and H11 and hence irradiation of it affects the observed coupling to both nuclei. However, since H6 couples only to H7, the resonances affected by irradiation of H11 could easily be identified.

Resonance **A** (H7) was transformed from a doublet to a singlet and the loss of a large coupling from **F** and a small one from **D** was observed. Hence **F** must be due to H10 and H4 and the loss of coupling from **D** implies that it may be due to H9, and this is reasonable from its dt pattern.

The 7.8 Hz splitting observed for the doublet resonance **E** implies that it must be coupled to proton H9 and it is therefore assigned to proton H8, leaving the remaining doublet **H** to be assigned to proton H5.

**Insert Figure C1**

**Table C1 :** The 1H NMR assignment of Ru4(-H)4(CO)10(dpp) **2**.

| Resonance |  / ppm | proton |
| --- | --- | --- |
| **A** | 8.92 | H7 |
| **B** | 8.89 | H2 |
| **C** | 8.67 | H6 & H11 |
| **D** | 8.04 | H9 |
| **E** | 7.94 | H8 |
| **F** | 7.56 | H4 & H10 |
| **G** | 7.34 | H3 |
| **H** | 7.04 | H5 |
